# Supplementary material for: An adaptable, reusable, and light implant for chronic Neuropixels probes
Source: eLife. 2025 Feb 18;13:RP98522. doi: 10.7554/eLife.98522 (PMC11835385; doi:10.7554/eLife.98522)
Supplement: Supplementary file 1. — This table provides extensive information on the animals used in the study, such as the implant date, probe number and type, number of recordings, or whether an issue was encountered during the implantation period. [file elife-98522-supp1.xlsx]

## Sheet: Sheet1
Ref ID	Implant date mm/dd/yyyy	Dual or single	Probe version	Implant type	Serial number	Number of uses	Location AP/ML	Prep	Number of recordings	Last day of recording	Cumulative number of days	Issue?	Group	Animal	Mouse Ref
1	05/11/2022	Single	2.0-Alpha	2.0-Alpha	19122519882	2	-3.8/1.25	headfixed	87	37	52	none	Carandini-Harris	Mouse	AV005
2	03/23/2022	Dual	2.0-Alpha	2.0-Alpha	19122519882, 19011111443	1, 1	-3.8/-1.25, -3.8/1.25	headfixed	88, 24	15, 2	15, 2	19011111443 broken	Carandini-Harris	Mouse	AV006
3	03/08/2022	Dual	2.0-Alpha	2.0-Alpha	19011110122, 19011119461	2, 1	1.7/0.9, 0.3/1.9	headfixed	124, 123	43, 43	78, 43	none	Carandini-Harris	Mouse	AV007
4	03/09/2022	Dual	2.0-Alpha	2.0-Alpha	19011111211, 19011111931	1, 1	-3.8/-1, -3.8/1	headfixed	207, 209	42, 42	42, 42	none	Carandini-Harris	Mouse	AV008
5	02/07/2022	Dual	2.0-Alpha	2.0-Alpha	19011118541, 19011111281	2, 1	1.6/1.2, 0.1/2.4	headfixed	303, 303	107, 107	122, 107	19011118541 "Shift register" error	Carandini-Harris	Mouse	AV009
6	05/19/2022	Dual	2.0-Alpha	2.0-Alpha	19011119461, 19011110122	2, 3	1.5/1.2, 0.1/1.9	headfixed	108, 108	41, 41	84, 119	none	Carandini-Harris	Mouse	AV013
7	06/06/2022	Dual	2.0-Alpha	2.0-Alpha	19011111211, 19011111931	2, 2	-3.9/-1.2, -3.9,1.2	headfixed	110, 110	39, 39	81, 81	none	Carandini-Harris	Mouse	AV014
8	06/29/2022	Dual	2.0-Alpha	2.0-Alpha	19122519041, 19122519053	1, 1	0.6/2.2, -1.2/3.6	headfixed	106, 106	37, 37	37, 37	none	Carandini-Harris	Mouse	AV015
9	07/25/2022	Single	2.0-Alpha	2.0-Alpha	19122519822	1	-3.8/1.2	headfixed	48	11	11	none	Carandini-Harris	Mouse	AV020
10	07/27/2022	Single	2.0-Alpha	2.0-Alpha	19011111211	3	2.1/1.2	headfixed	26	9	90	none	Carandini-Harris	Mouse	AV021
11	11/30/2022	Dual	2.0-Alpha	2.0-Alpha	19122519041, 19122519053	3, 3	1.5/-1.0, 1.5/1.0	headfixed	44, 43	14, 14	58, 58	none	Carandini-Harris	Mouse	AV023
12	10/11/2022	Dual	2.0-Alpha	2.0-Alpha	19122519053, 19122519041	2, 2	-3.8/1.25,-3.8/1.25	headfixed	29, 29	7, 7	44, 44	none	Carandini-Harris	Mouse	AV024
13	11/07/2022	Dual	2.0-Alpha	2.0-Alpha	20403320773, 20403320852	1, 1	-3.9/-1.6, -3.9/1.6	headfixed	92, 90	25, 25	25, 25	none	Carandini-Harris	Mouse	AV025
14	10/26/2022	Single	2.0-Alpha	2.0-Alpha	19011111211	4	-3.8/-1.1	headfixed	48	15	105	none	Carandini-Harris	Mouse	AV028
15	12/06/2022	Dual	2.0-Alpha	2.0-Alpha	20403320852, 20403320773	2, 2	-3.9/-1.6, -3.9/1.6	headfixed	41, 41	12, 12	37, 37	none	Carandini-Harris	Mouse	AV030
16	12/06/2022	Single	2.0-Alpha	2.0-Alpha	19011110512	6	-3.9/-1.6	headfixed	36	12	90	"Shift register" error	Carandini-Harris	Mouse	AV034
17	12/07/2022	Single	2.0-Alpha	2.0-Alpha	19122519882	3	-1.1/3.0	headfixed	20	7	59	none	Carandini-Harris	Mouse	AV035
18	07/26/2023	Dual	2.0-Alpha	2.0-Alpha + free HS	19122519041, 19122519053	4, 4	-2.2/1.0, -2.2/-1.0	freely moving	75, 73	84, 82	142, 140	Dual "Shift register" error	Carandini-Harris	Mouse	AV049
19	09/08/2021	Single	2.0-Alpha	2.0-Alpha	19011110242	1	-3.5/2.5	headfixed	10	8	8	none	Carandini-Harris	Mouse	CB015
20	09/27/2021	Single	2.0-Alpha	2.0-Alpha	19011110242	2	-3.5/2.5	headfixed	110	37	45	none	Carandini-Harris	Mouse	CB016
21	09/29/2021	Single	2.0-Alpha	2.0-Alpha	19011110803	1	-3.5/2.5	headfixed	85	35	35	Probe broken	Carandini-Harris	Mouse	CB017
22	10/11/2021	Single	2.0-Alpha	2.0-Alpha	19011110512	1	-3.5/-2.5	headfixed	25	15	15	none	Carandini-Harris	Mouse	CB018
23	10/14/2021	Single	2.0-Alpha	2.0-Alpha	19011110273	1	-3.5/-2.5	headfixed	5	11	11	none	Carandini-Harris	Mouse	CB019
24	11/10/2021	Single	2.0-Alpha	2.0-Alpha	19011110122	1	-3.5/2.5	headfixed	17	35	35	none	Carandini-Harris	Mouse	CB020
25	04/26/2022	Single	2.0-Alpha	2.0-Alpha	19011110512	4	-3.1/2.8	headfixed	45	24	54	none	Carandini-Harris	Mouse	EB014
26	06/29/2022	Single	2.0-Alpha	2.0-Alpha	19011110512	5	-3.1/2.8	headfixed	28	24	78	none	Carandini-Harris	Mouse	EB019
27	12/03/2021	Single	2.0-Alpha	2.0-Alpha	19011118541	1	-3.8/-1.2	headfixed	25	15	15	none	Carandini-Harris	Mouse	FT032
28	12/02/2021	Single	2.0-Alpha	2.0-Alpha	19011110512	2	-3.5/2.5	headfixed	24	11	26	none	Carandini-Harris	Mouse	FT033
29	12/14/2021	Single	2.0-Alpha	2.0-Alpha	19011110512	3	-3.8/1.2	headfixed	22	4	30	none	Carandini-Harris	Mouse	FT035
30	11/03/2021	Single	2.0-Alpha	2.0-Alpha	19011110273	2	-3.8/1.2	headfixed	9	5	16	none	Carandini-Harris	Mouse	FT038
31	11/13/2021	Single	2.0-Alpha	2.0-Alpha	19011110273	3	-3.8/1.2	headfixed	18	13	29	none	Carandini-Harris	Mouse	FT039
32	08/03/2022	Dual	2.0-Alpha	2.0-Alpha	19122519751, 19122507071	1, 1	0.3/1.5, -3.0/1.3	headfixed	34, 33	34, 34	34, 34	none	Carandini-Harris	Mouse	JF084
33	10/27/2022	Dual	1.0	1.0	18442112132, 18442112082	1, 1	-2.7/0.6, -0.1/2.2	headfixed	24, 31	42, 54	42, 54	18442112132 "Shift register" error	Churchland	Mouse	Churchland001
34	01/11/2023	Single	1.0	1.0 + free HS	19051017632	1	-2.1/2.2	freely moving	4	14	14	none	Lignani-Kullman	Mouse	Lignani001
35	08/24/2023	Single	1.0	1.0 + side HS holder	19108307361	1	-2.0/1.8	freely moving	16	27	27	none	Lignani-Kullman	Mouse	Lignani002
36	07/26/2023	Single	1.0	1.0 + top HS holder	18005117462	1	-1.1/-0.5	freely moving	5	32	32	none	Mainen	Mouse	Mainen001
37	09/26/2023	Single	2.0	2.0-Alpha miniature	22420009082	1	-1.8/3.4	freely moving	2	5	5	none	Margrie	Mouse	Margrie001
38	09/28/2023	Single	2.0-Alpha	2.0-Alpha miniature	20403314113	1	-1.8/3.4	freely moving	3	7	7	none	Margrie	Mouse	Margrie002
39	09/29/2023	Single	2.0	2.0-Alpha miniature	22420009934	1	-1.8/3.4	freely moving	3	6	6	none	Margrie	Mouse	Margrie003
40	10/11/2023	Single	2.0	2.0-Alpha miniature	22420009884	1	-1.8/3.4	freely moving	2	27	27	none	Margrie	Mouse	Margrie004
41	10/12/2023	Single	2.0	2.0-Alpha miniature	22420009932	1	-3.4/2.15	freely moving	1	4	4	none	Margrie	Mouse	Margrie005
42	11/20/2023	Single	2.0	2.0-miniature	22420009882	1	-3.4/2.15	freely moving	2	14	14	none	Margrie	Mouse	Margrie006
43	12/16/2023	Single	2.0	2.0-miniature	22420009082	2	-1.8/3.4	freely moving	2	4	9	none	Margrie	Mouse	Margrie007
44	12/15/2023	Single	2.0	2.0-miniature	22420009884	2	-1.8/3.4	freely moving	2	5	32	none	Margrie	Mouse	Margrie008
45	10/22/2023	Single	1.0	1.0	19076606742	1	-3.2/-2.8	headfixed	9	30	30	none	Rochefort	Mouse	Rochefort001
46	12/08/2023	Single	1.0	1.0 modified for headplate	19076606742	2	-3.3/-2.2	headfixed	6	6	36	none	Rochefort	Mouse	Rochefort002
47	07/03/2023	Single	1.0	1.0 + SpikeGadgets device	19192722572	1	4.4/1.6	freely moving	15	22	22	none	Wikenheiser	Rat	Wikenheiser001
48	11/14/2023	Single	1.0	1.0 + SpikeGadgets device	19192722572	2	3.6/1.5	freely moving	27	34	56	none	Wikenheiser	Rat	Wikenheiser002
49	01/19/2024	Single	1.0	1.0 + SpikeGadgets device	19192722702	1	3.6/1.7	freely moving	17	54	54	Connection error	Wikenheiser	Rat	Wikenheiser003
50	01/29/2024	Single	1.0	1.0 + side HS holder	19454410282	1	1.8/0.3	freely moving	12	ongoing	ongoing	none	Duan	Mouse	Duan001
51	01/30/2024	Single	1.0	1.0 + side HS holder	18442122672	1	1.8/0.3	freely moving	12	ongoing	ongoing	none	Duan	Mouse	Duan002
52	06/13/2024	Dual	2.0	2.0-Alpha	20403320272,19122516073	3, 3	2.25/-1.1, 2.25/1.1	headfixed	179180	189	189	none	Carandini-Harris	Mouse	GB012
